# Supplementary material for: Highly-efficient heterojunction solar cells based on 2D Janus transition-metal nitride halide (TNH) monolayers with ultrahigh carrier mobility
Source: Royal Society of Chemistry journal article supplement (doi:10.1039/d3nr03417h), 2023-01-01
Supplement: d3nr03417h1.pdf [file d3nr03417h1.pdf]

**Electronic supplementary information for**

**Highly-efficient heterojunction solar cells based on 2D Janus**

**transition-metal nitride halide (TNH) monolayers with ultrahigh**

**carrier mobility**

Wanying Xie,<sup>a,‡</sup> Jiafei Pang,<sup>a,‡</sup> Jinni Yang,<sup>a</sup> Xiaoyu Kuang<sup>a,\*</sup> and Aijie Mao<sup>a,\*</sup>

<sup>a</sup>Institute of Atomic and Molecular Physics, Sichuan University, Chengdu, 610065, China

<sup>‡</sup>These authors contributed equally

<sup>\*</sup>Corresponding author: scu\_kuang@163.com scu\_mij@126.com

**Table S1** Lattice constants  $l_a$  (Å), band gaps  $E_g$  (eV) calculated from PBE ( $E_{g,PBE}$ ), HSE06 ( $E_{g,HSE}$ ) and HSE06+SOC ( $E_{g,HSE+SOC}$ ) for Janus TNH monolayers.

| Material | $l_a$ (Å) | $E_{g,PBE}$ (eV) | $E_{g,HSE}$ (eV) | $E_{g,HSE+SOC}$ (eV) |
|----------|-----------|------------------|------------------|----------------------|
| TiNCl    | 3.19      | 2.53             | 3.64             | 3.54                 |
| ZrNCl    | 3.45      | 3.18             | 4.25             | 4.33                 |
| HfNCl    | 3.39      | 3.82             | 4.93             | 4.74                 |
| FeNCl    | 3.03      | 0.57             | 1.48             | 1.71                 |
| FeNF     | 2.86      | 1.23             | 2.20             | 2.72                 |
| PdNCl    | 3.14      | 0.52             | 1.34             | 0.93                 |
| PdNF     | 3.02      | 0.99             | 2.01             | 2.08                 |
| PtNCl    | 3.15      | 0.72             | 1.55             | 1.05                 |
| PtNF     | 3.06      | 0.93             | 1.94             | 1.82                 |
| OsNCl    | 3.15      | 0.97             | 1.67             | 1.38                 |
| ReNCl    | 3.10      |                  |                  |                      |

**Table S2** Calculated elastic constants ( $C_{11}$ ,  $C_{12}$ , and  $C_{66}$ ) of TNH monolayers.

| Material    | $C_{11}$ | $C_{12}$ | $C_{66}$ |
|-------------|----------|----------|----------|
| TiNCl       | 129.00   | 47.12    | 40.92    |
| ZrNCl       | 121.28   | 50.38    | 35.44    |
| HfNCl       | 128.58   | 50.02    | 39.26    |
| FeNCl       | 157.20   | 50.92    | 53.12    |
| FeNF        | 164.98   | 52.20    | 56.38    |
| PdNCl       | 83.90    | 23.44    | 30.22    |
| PdNF        | 69.60    | 13.26    | 30.52    |
| PtNCl       | 89.90    | 26.90    | 31.92    |
| PtNF        | 69.32    | 20.32    | 28.90    |
| OsNCl       | 160.50   | 62.05    | 49.22    |
| ReNCl       | 123.20   | -80.02   | -78.32   |
| OsNCl/FeNCl | 315.82   | 109.38   | 104.34   |

**Table S3** Bader charges of all atoms constituting the janus TNH monolayers, and the electrostatic potential difference ( $\Delta\Phi$ ) of them.

| <b>System</b> | <b>Bader charge</b> |        |   |       |    | <b><math>\Delta\Phi</math> (eV)</b> |        |
|---------------|---------------------|--------|---|-------|----|-------------------------------------|--------|
| TiNCl         | Ti                  | -1.627 | N | 1.183 | Cl | 0.444                               | 0.218  |
| ZrNCl         | Zr                  | -2.150 | N | 1.545 | Cl | 0.605                               | 0.110  |
| HfNCl         | Hf                  | -1.682 | N | 1.189 | Cl | 0.493                               | 0.153  |
| FeNCl         | Fe                  | -1.045 | N | 0.771 | Cl | 0.274                               | 0.484  |
| FeNF          | Fe                  | -1.354 | N | 0.728 | F  | 0.626                               | 1.620  |
| PdNCl         | Pd                  | -0.847 | N | 0.571 | Cl | 0.276                               | -1.217 |
| PdNF          | Pd                  | -1.057 | N | 0.483 | F  | 0.573                               | 0.184  |
| PtNCl         | Pt                  | -0.898 | N | 0.602 | Cl | 0.296                               | -1.546 |
| PtNF          | Pt                  | -1.292 | N | 0.599 | F  | 0.693                               | -0.156 |
| OsNCl         | Os                  | -1.216 | N | 0.818 | Cl | 0.398                               | 0.490  |
| ReNCl         | Re                  | -1.501 | N | 1.133 | Cl | 0.367                               | 0.699  |

**Table S4** The calculated DP constants  $E_1$  (eV), elastic moduli  $C_{2D}$  ( $N m^{-1}$ ), effective masses  $m^*/m_0$ , relaxation-time  $\tau$  ( $10^2$  s) and carrier mobility  $\mu$  ( $10^2 cm^2 V^{-1} s^{-1}$ ) of the 2D TNHs for electrons (e) and holes (h) along the  $a$ - and  $b$ -directions.

| System | Carrier type | $E_1$ (eV) | $C_{2D}$ ( $N m^{-1}$ ) | $m^*/m_0$ | $\tau$ ( $10^2$ s) | $\mu$ ( $10^2 cm^2 V^{-1} s^{-1}$ ) |
|--------|--------------|------------|-------------------------|-----------|--------------------|-------------------------------------|
| TiNCl  | e(a-axis)    | 1.39       | 129.74                  | 0.33      | 16.38              | 83.22                               |
|        | h(a-axis)    | 2.97       |                         | 0.98      | 1.21               | 2.07                                |
|        | e(b-axis)    | 2.05       | 128.07                  | 1.15      | 2.14               | 3.12                                |
|        | h(b-axis)    | 6.20       |                         | 4.39      | 0.06               | 0.02                                |
| ZrNCl  | e(a-axis)    | 1.5        | 118.13                  | 0.65      | 6.53               | 16.90                               |
|        | h(a-axis)    | 0.22       | 116.76                  | 2.44      | 81.04              | 55.98                               |
|        | e(b-axis)    | 3.09       |                         | 0.57      | 1.74               | 5.18                                |
|        | h(b-axis)    | 0.79       | 1.41                    | 10.74     | 12.85              |                                     |
| HfNCl  | e(a-axis)    | 1.02       | 129.41                  | 1.03      | 9.70               | 15.79                               |
|        | h(a-axis)    | 4.57       |                         | 1.82      | 0.27               | 0.25                                |
|        | e(b-axis)    | 1.81       | 129.32                  | 0.74      | 4.32               | 9.87                                |
|        | h(b-axis)    | 4.43       |                         | 3.00      | 0.18               | 0.10                                |
| FeNCl  | e(a-axis)    | 0.65       | 156.27                  | 0.71      | 41.82              | 98.51                               |
|        | h(a-axis)    | 1.21       |                         | 2.15      | 4.01               | 3.14                                |
|        | e(b-axis)    | 3.91       | 168.14                  | 0.70      | 0.27               | 3.05                                |
|        | h(b-axis)    | 5.42       |                         | 3.35      | 0.14               | 0.07                                |
| FeNF   | e(a-axis)    | 0.32       | 164.84                  | 2.31      | 56.16              | 40.82                               |
|        | h(a-axis)    | 2.11       |                         | 1.40      | 2.13               | 2.55                                |
|        | e(b-axis)    | 0.78       | 162.26                  | 0.84      | 25.54              | 50.96                               |
|        | h(b-axis)    | 0.95       |                         | 4.02      | 3.61               | 1.51                                |
| PdNCl  | e(a-axis)    | 1.63       | 81.58                   | 3.47      | 0.71               | 0.35                                |
|        | h(a-axis)    | 0.87       |                         | 1.12      | 7.79               | 11.73                               |
|        | e(b-axis)    | 1.8        | 81.56                   | 1.70      | 1.20               | 1.19                                |
|        | h(b-axis)    | 1.64       |                         | 1.01      | 2.43               | 4.06                                |
| PdNF   | e(a-axis)    | 4.85       | 83.86                   | 2.26      | 0.13               | 0.09                                |
|        | h(a-axis)    | 5.37       |                         | 1.61      | 0.15               | 0.15                                |
|        | e(b-axis)    | 0.83       | 91.44                   | 1.25      | 8.57               | 11.52                               |
|        | h(b-axis)    | 5.33       |                         | 3.54      | 0.07               | 0.03                                |
| OsNCl  | e(a-axis)    | 0.62       | 159.57                  | 0.29      | 115.68             | 670.97                              |
|        | h(a-axis)    | 5.23       |                         | 0.25      | 1.90               | 12.89                               |
|        | e(b-axis)    | 1.79       | 159.73                  | 0.31      | 12.98              | 70.44                               |
|        | h(b-axis)    | 4.39       |                         | 2.80      | 0.24               | 0.14                                |
| PtNCl  | e(a-axis)    | 2.13       | 90.99                   | 2.62      | 0.62               | 0.40                                |
|        | h(a-axis)    | 0.74       |                         | 0.88      | 15.21              | 29.00                               |
|        | e(b-axis)    | 1.41       | 90.99                   | 0.75      | 4.94               | 11.11                               |
|        | h(b-axis)    | 0.79       |                         | 5.42      | 2.17               | 0.67                                |

|      |           |      |       |      |       |       |
|------|-----------|------|-------|------|-------|-------|
| PtNF | e(a-axis) | 2.13 | 83.75 | 0.97 | 1.53  | 2.65  |
|      | h(a-axis) | 0.74 |       | 0.60 | 20.75 | 58.66 |
|      | e(b-axis) | 2.28 | 83.60 | 1.19 | 1.11  | 1.57  |
|      | h(b-axis) | 1.39 |       | 6.58 | 0.54  | 0.14  |

**Table S5:** The reduced effective mass of exciton  $\mu_{ex}$ , 2D macroscopic static dielectric constant  $\epsilon_r$ , exciton binding energy  $E_{exc}$  (eV) and exciton Bohr radius  $a^*$  ( $\text{\AA}$ ) of OsNCl and FeNCl monolayers.

| system | $\mu_{ex}$   |              | $\epsilon_{2D}$   |                   | $E_{exc}$ (eV) |             | $a^*$ ( $\text{\AA}$ ) |         |
|--------|--------------|--------------|-------------------|-------------------|----------------|-------------|------------------------|---------|
|        | $\mu_{ex}^x$ | $\mu_{ex}^y$ | $\epsilon_{2D}^x$ | $\epsilon_{2D}^y$ | $E_{exc}^x$    | $E_{exc}^y$ | $a_x^*$                | $a_y^*$ |
| OsNCl  | 0.13         | 0.27         | 7.17              | 7.17              | 0.14           | 0.28        | 7.29                   | 3.26    |
| FeNCl  | 0.53         | 0.57         | 5.39              | 5.39              | 0.99           | 1.08        | 1.34                   | 1.25    |

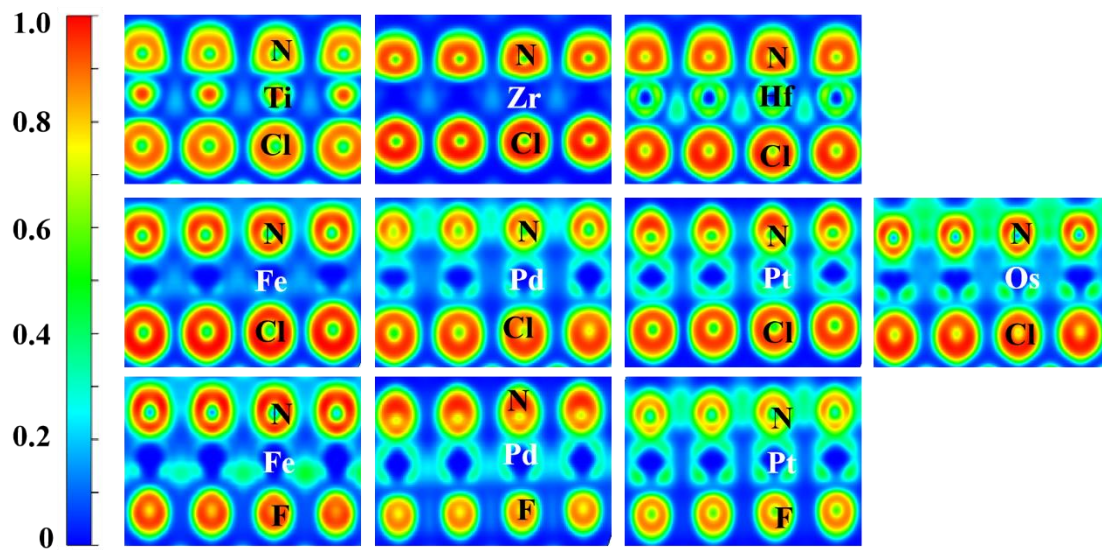

Fig S1: The electron localization functions (ELFs) of TNH monolayers along the T-N-H planes.

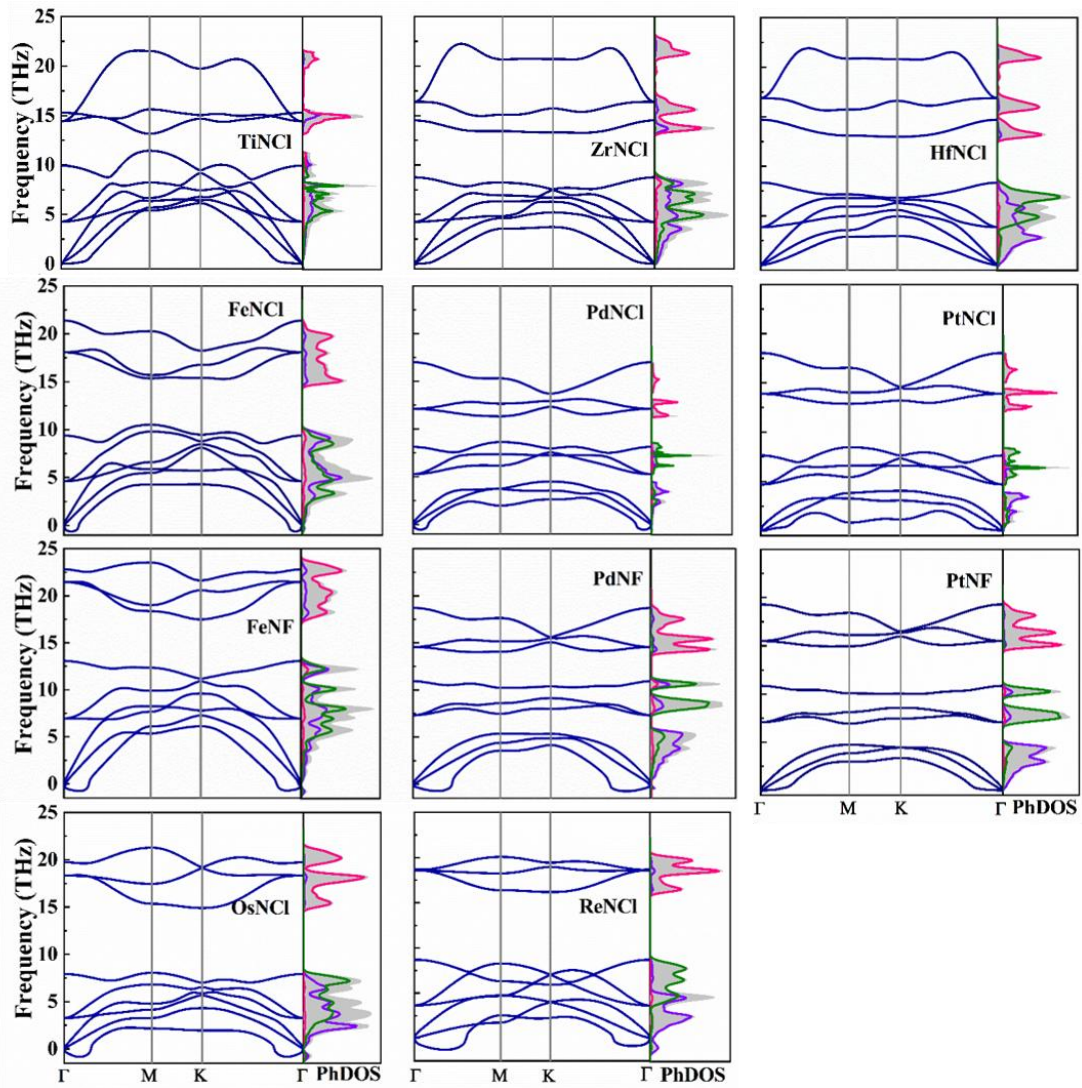

**Fig. S2** Phonon band dispersion curves and projected phonon state density (PhDOS) of monolayer TNHs (T=Ti, Zr, Hf, Fe, Pd, Pt, Os and Re, H = Cl and F), slight imaginary frequency near the G-spot doesn't mean the structure is unstable. For PhDOS, the purple, green and red lines are contributed by transition metal (T), nitrogen (N) and halogens (H) atoms, respectively.

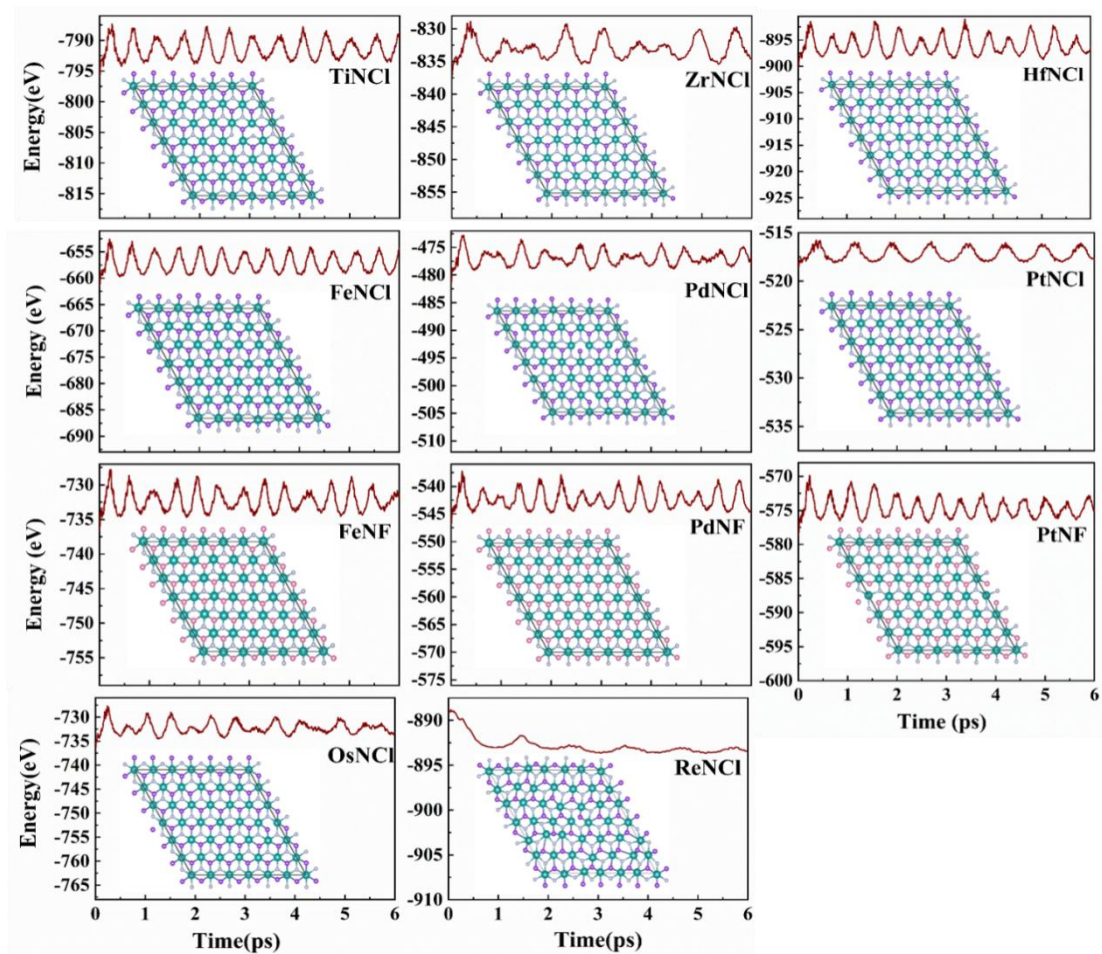

**Fig. S3** Total energy fluctuation for Janus TNH monolayers during the AIMD simulation, the illustrations are the atomic structures after 6 ps at 300 K. All non-magnetic structures at 300 K to confirm the thermodynamic stability while 1L-ReNCl is thermodynamically stable at 50K, the supercell of  $6 \times 6 \times 1$  shows slight deformation and bond breakage for 1L-ReNCl. Here, the transition metal (T) atom, N atom, Cl atom and F atom are labeled cyan, gray, purple and pink.



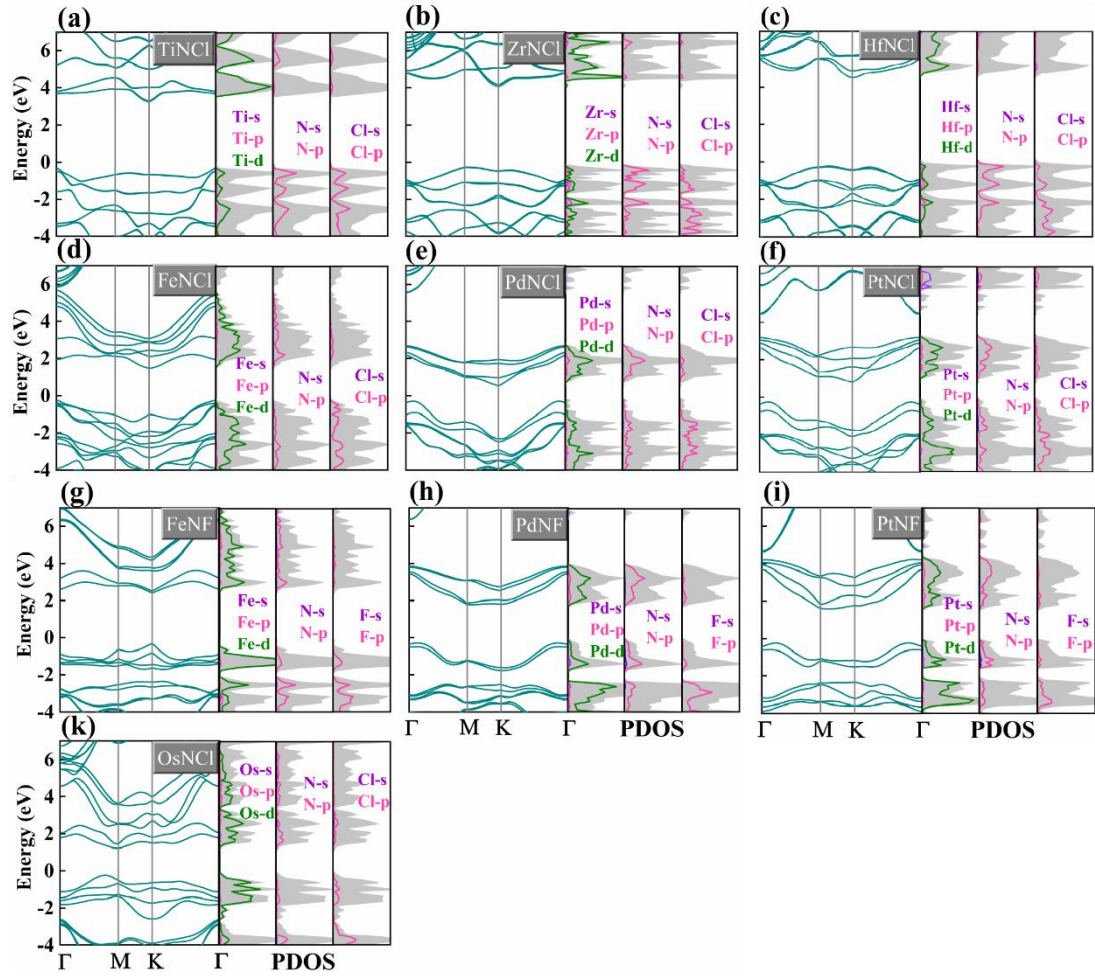

Fig. S4 Electronic band structures and projected density of states (PDOS) of janus TNH monolayers by using HSE+SOC. The Fermi level is set at 0.

Atomic lattices in VASP POSCAR format.

TiNCl  
1.0000000000000000  
3.1892767007098541 -0.0000004909871754 0.0000000000000000  
-1.5946387792294885 2.7619956940458423 0.0000000000000000  
0.0000000000000000 0.0000000000000000 20.0000000000000000  
Ti N Cl  
1 1 1  
Direct  
0.0000002752165482 0.9999998274913051 0.6157957050996479  
0.6666669089281024 0.3333332393291135 0.6468319397900241  
0.3333328448553412 0.6666669621795944 0.5268423721103203

ZrNCl  
1.0000000000000000  
3.4454166427422348 -0.0000001081111996 0.0000000000000000  
-1.7227084155136612 2.9838183585528668 0.0000000000000000  
0.0000000000000000 0.0000000000000000 20.0000000000000000  
Zr N Cl  
1 1 1  
Direct  
0.0000001132427310 0.9999998848567387 0.6165924401530065  
0.6666667804323543 0.3333332524011559 0.6491133886146496  
0.3333331361177584 0.6666668925470852 0.5237641882479112

HfNCl  
1.0000000000000000  
3.3865505447651487 0.0000003194749967 0.0000000000000000  
-1.6932749857162657 2.9328392542526420 0.0000000000000000  
0.0000000000000000 0.0000000000000000 20.0000000000000000  
Hf N Cl  
1 1 1  
Direct  
0.0000005458043404 0.9999995186781021 0.6168607519057545  
0.6666670459121917 0.3333329128734306 0.6486785872600294  
0.3333324380763187 0.6666675982534613 0.5239306778497550

FeNCl  
1.0000000000000000  
2.9805468595893374 -0.0000012113329819 0.0000000000000000  
-1.4902744798676966 2.5812280414689308 0.0000000000000000  
0.0000000000000000 0.0000000000000000 20.0000000000000000  
Fe N Cl  
1 1 1  
Direct  
0.0000004797050934 0.9999995510366801 0.6147010129094994  
0.6666672959673008 0.3333327142059872 0.6451179706080978  
0.3333322541204495 0.6666677645623267 0.5296510334979487

FeNF  
1.0000000000000000  
2.8574376285331784 0.0000000000000000 0.0000000000000000  
-1.4287188143079788 2.4746131594072969 0.0000000000000000  
0.0000000000000000 0.0000000000000000 20.0000000000000000

Fe N F  
 1 1 1  
 Direct  
 0.0000005184620757 0.0000005107652563 0.6070459428665942  
 0.6666672926441679 0.3333336964786111 0.6392743630019845  
 0.3333322178937481 0.6666658217561243 0.5431497111314347

PdNCl  
 1.0000000000000000  
 3.1362082009235848 0.0000000000000030 0.0000000000000000  
 -1.5681041005072167 2.7160351763046742 0.0000000000000000  
 0.0000000000000000 0.0000000000000000 20.0000000000000000

Pd N Cl  
 1 1 1  
 Direct  
 0.0000000989723915 0.9999998917698530 0.6085786335672941  
 0.6666669306160303 0.3333331732025737 0.6591674926518627  
 0.3333330002044219 0.6666669648325529 0.5217238907963964

PdNF  
 1.0000000000000000  
 3.0105624682910306 0.0000010067854033 0.0000000000000000  
 -1.5052848724075132 2.6072213156041015 0.0000000000000000  
 0.0000000000000000 0.0000000000000000 20.0000000000000000

Pd N F  
 1 1 1  
 Direct  
 0.0000000565282339 0.999999982259952 0.6017008589513895  
 0.6666667424213257 0.3333331795022543 0.6525071419848328  
 0.3333332300504321 0.6666668512717494 0.5352620160637699

PtNCl  
 1.0000000000000000  
 3.1496600226092171 0.0000000000025189 0.0000000000000000  
 -1.5748300113480493 2.7276846710202465 0.0000000000000000  
 0.0000000000000000 0.0000000000000000 20.0000000000000000

Pt N Cl  
 1 1 1  
 Direct  
 0.0000000027881819 0.999999704776988 0.6093210539027336  
 0.6666666867635707 0.3333332268781711 0.6599016941684325  
 0.3333333402410841 0.6666668324491171 0.5202472689443871

OsNCl  
 1.0000000000000000  
 3.1954291608194754 -0.0000014690598516 0.0000000000000000  
 -1.5977158515033745 2.7673222518159197 0.0000000000000000  
 0.0000000000000000 0.0000000000000000 20.0000000000000000

Os N Cl  
 1 1 1  
 Direct  
 0.0000006251632030 0.9999994118062006 0.6165463580101260  
 0.6666675541191438 0.3333325185448004 0.6480957572409665  
 0.3333318505104970 0.6666680994539860 0.5248279017644748
